# Supplementary material for: Activation of the PPARγ Prevents Ferroptosis-Induced Neuronal Loss in Response to Intracerebral Hemorrhage Through Synergistic Actions With the Nrf2
Source: Front Pharmacol. 2022 Apr 20;13:869300. doi: 10.3389/fphar.2022.869300 (PMC9065416; doi:10.3389/fphar.2022.869300)
Supplement: Supplementary file 3 [file Table3.XLSX]

## Sheet: Sheet1
Water content of brain tissue after ICH (First independent experiment)
*** Water content % = (1-dry weight/original weight)×100%
3d after ICH model
	Control			ICH			PDZ			PDZ+ML385
	No.1	No.2	No.3	No.1	No.2	No.3	No.1	No.2	No.3	No.1	No.2	No.3
Original weight	2.262	2.343	2.239	4.762	3.251	4.762	2.756	3.229	3.798	3.755	3.853	4.547
Dry weight	0.617	0.613	0.685	0.576	0.542	0.692	0.596	0.636	0.689	0.561	0.643	0.676
Water content %	72.711	73.856	69.4	87.904	83.326	85.469	78.383	80.302	81.855	85.054	83.324	85.141
7d after ICH model
	Control			ICH			PDZ			PDZ+ML385
	No.1	No.2	No.3	No.1	No.2	No.3	No.1	No.2	No.3	No.1	No.2	No.3
Original weight	2.244	2.745	2.074	2.848	2.555	3.056	1.984	1.93	1.775	2.617	2.004	1.953
Dry weight	0.621	0.714	0.628	0.596	0.567	0.709	0.578	0.529	0.513	0.593	0.516	0.522
Water content %	72.301	73.977	69.734	79.075	77.815	76.795	70.871	72.58	71.125	77.352	74.239	73.249
